# Supplementary material for: Differences in Rhizosphere Microbial Community Structure and Composition in Resistance and Susceptible Wheat to Fusarium Head Blight
Source: Hindawi journal article supplement (doi:10.1155/2023/9963635), 2023-10-31
Supplement: f1 [file 9963635.f1.pdf]

Supplement Table 1 Quality assessment of fungal diversity sequencing

| Sample ID | PE Reads | Raw Tags | Clean Tags | effective Tags | AvgLen(bp) | GC(%) | Q20(%) | Q30(%) |
|-----------|----------|----------|------------|----------------|------------|-------|--------|--------|
| SM3       | 329186   | 315723   | 306789     | 306535         | 270        | 45.65 | 98.85  | 97.39  |
| YM16      | 288048   | 275725   | 267840     | 267573         | 248        | 43.49 | 99.19  | 98.03  |
| ZM20      | 222874   | 211243   | 205187     | 205119         | 254        | 45.28 | 99.11  | 97.84  |
| ZM9023    | 259433   | 247960   | 241113     | 241004         | 241        | 45.5  | 99.31  | 98.23  |

---

Effective(%)

93.12

92.89

92.03

92.9

---
