# Supplementary material for: Differences in Rhizosphere Microbial Community Structure and Composition in Resistance and Susceptible Wheat to Fusarium Head Blight
Source: Hindawi journal article supplement (doi:10.1155/2023/9963635), 2023-10-31
Supplement: f2 [file 9963635.f2.pdf]

Supplement Table 2 Quality assessment of bacterial diversity sequencing

| Sample ID | PE Reads | Raw Tags | Clean Tags | effective Tags | AvgLen(bp) | GC(%) | Q20(%) | Q30(%) |
|-----------|----------|----------|------------|----------------|------------|-------|--------|--------|
| SM3       | 156800   | 150388   | 136053     | 135603         | 423        | 56.39 | 96.06  | 92.45  |
| YM16      | 118494   | 113286   | 101682     | 101434         | 422        | 56.72 | 95.93  | 92.19  |
| ZM20      | 122136   | 116994   | 105394     | 105215         | 422        | 56.78 | 96.02  | 92.34  |
| ZM9023    | 146065   | 139999   | 126369     | 126140         | 423        | 56.8  | 96.06  | 92.42  |

Effective(%)

86.48

85.6

86.15

86.36
